# Supplementary material for: Methods for the Preparation of Large Quantities of Complex Single-Stranded Oligonucleotide Libraries
Source: PLoS One. 2014 Apr 14;9(4):e94752. doi: 10.1371/journal.pone.0094752 (PMC3986247; doi:10.1371/journal.pone.0094752)
Supplement: Table S2 — Theoretical ssDNA yield with IVT-RT method from use of a single 100 µl emulsion PCR amplicons. (DOC) [file pone.0094752.s003.doc]

**Methods for the Preparation of Large Quantities of Single-Stranded Oligonucleotide Libraries**

**Yusuf E. Murghaa, Jean-Marie Rouillardb,1, Erdogan Gularib**

**aDepartment of Biomedical Engineering, University of Michigan, Ann Arbor, MI**

**bDepartment of Chemical Engineering, University of Michigan, Ann Arbor, MI**

1To whom correspondence may be addressed. Mail: Jean-Marie Rouillard, Chemical Engineering, 2300 Hayward St., 3074 H.H. Dow Building, Ann Arbor, MI 48109-2136; Phone: (734) 763 4722; Email: [jmrouill@umich.edu](mailto:jmrouill@umich.edu)

**Table S2. Theoretical ssDNA yield with IVT-RT method from use of a single 100 μl emulsion PCR amplicons**

| ***Reaction*** | ***Input*** | ***Output*** |
| --- | --- | --- |
| *Emulsion PCR* | 2.5 fmol | 25 pmol |
| **IVT-RT method** | | |
| *In vitro transcription* | 25 pmol | 18750 pmol |
| *Reverse transcription* | 18750 pmol | 9375 pmol |
| *PBS-free ssDNA (affinity isolation)* | 9375 pmol | 4687 pmol* |
| **Lambda exonuclease method** | | |
| Lambda exonuclease | 25 pmol | 20 pmol |
| PBS-free ssDNA (affinity isolation) | 20 pmol | 10 pmol* |

*IVT-RT method gives > 450-fold PBS-free ssDNA than lambda exonuclease method
